# Supplementary material
Source: PubMed Central journal article supplement (PMC3566403)
Supplement: TS1-2.pdf [file TS1-2.pdf]

**Title:**

Improved cadmium uptake and accumulation in the hyperaccumulator *Sedum alfredii*: the impacts of citric acid and tartaric acid

**Authors:**

Ling-li Lu, Sheng-ke Tian, Xiao-e Yang\*, Hong-yun Peng, Ting-qiang Li

**Institutions:**

MOE Key Laboratory of Environment Remediation and Ecosystem Health, College of Environmental and Resources Science, Zhejiang University, Hangzhou 310029, China

**Table S1 Cd speciation in the uptake solution with addition of different Cd and organic acid levels as calculated by Visual-Minteq 3.0**

| <b>Cd (<math>\mu\text{mol/L}</math>)</b>      | <b>10</b>                           |       |       | <b>100</b> |        |        |
|-----------------------------------------------|-------------------------------------|-------|-------|------------|--------|--------|
| <b>Organic acid</b>                           | 0                                   | 10    | 100   | 0          | 10     | 100    |
|                                               | Citric acid ( $\mu\text{mol/L}$ )   |       |       |            |        |        |
| <b>Cd<sup>2+</sup></b>                        | 9.242                               | 9.060 | 7.523 | 91.353     | 89.846 | 76.843 |
| <b>CdCl<sup>+</sup></b>                       | 0.755                               | 0.740 | 0.617 | 8.603      | 8.466  | 7.277  |
| <b>CdCl<sub>2</sub> (aq)</b>                  | 0.003                               | 0.003 | 0.002 | 0.039      | 0.038  | 0.033  |
| <b>Cd-Citrate<sup>-</sup></b>                 |                                     | 0.188 | 1.779 |            | 1.576  | 15.174 |
| <b>CdH-Citrate (aq)</b>                       |                                     | 0.008 | 0.078 |            | 0.069  | 0.662  |
| <b>CdH<sub>2</sub>-Citrate<sup>+</sup></b>    |                                     | 0.000 | 0.000 |            | 0.000  | 0.003  |
|                                               | Tartaric acid ( $\mu\text{mol/L}$ ) |       |       |            |        |        |
| <b>Cd<sub>2</sub><sup>+</sup></b>             | 9.242                               | 9.217 | 8.997 | 91.353     | 91.118 | 89.054 |
| <b>CdCl<sup>+</sup></b>                       | 0.755                               | 0.752 | 0.730 | 8.603      | 8.576  | 8.339  |
| <b>CdCl<sub>2</sub> (aq)</b>                  | 0.003                               | 0.003 | 0.003 | 0.039      | 0.039  | 0.038  |
| <b>CdH-Tartrate<sup>+</sup></b>               |                                     | 0.000 | 0.001 |            | 0.000  | 0.005  |
| <b>Cd-Tartrate (aq)</b>                       |                                     | 0.028 | 0.269 |            | 0.262  | 2.551  |
| <b>Cd-(Tartrate)<sub>2</sub><sup>2-</sup></b> |                                     | 0.000 | 0.000 |            | 0.000  | 0.004  |

**Table S2 Cd speciation in the nutrient solution with addition of 100  $\mu\text{mol/L}$  Cd and different citric acid or tartaric acid levels as calculated by Visual-Minteq 3.0**

| Cd Speciation                   | Citric acid ( $\mu\text{mol/L}$ ) |        |        |        |        | Tartaric acid ( $\mu\text{mol/L}$ ) |        |        |        |
|---------------------------------|-----------------------------------|--------|--------|--------|--------|-------------------------------------|--------|--------|--------|
|                                 | 0                                 | 10     | 50     | 100    | 500    | 50                                  | 100    | 250    | 500    |
| $\text{Cd}(\text{SO}_4)_2^{2-}$ | 0.011                             | 0.011  | 0.011  | 0.010  | 0.007  | 0.011                               | 0.011  | 0.011  | 0.011  |
| $\text{Cd}^{2+}$                | 8.670                             | 8.559  | 8.137  | 7.653  | 5.025  | 8.585                               | 8.501  | 8.259  | 7.881  |
| $\text{CdCl}^+$                 | 0.109                             | 0.108  | 0.103  | 0.097  | 0.064  | 0.108                               | 0.107  | 0.104  | 0.099  |
| $\text{CdEDTA}^{2-}$            | 89.953                            | 90.042 | 90.384 | 90.765 | 92.668 | 89.987                              | 90.017 | 90.115 | 90.260 |
| $\text{CdHEDTA}^-$              | 0.224                             | 0.224  | 0.225  | 0.226  | 0.232  | 0.224                               | 0.224  | 0.224  | 0.224  |
| $\text{CdHPO}_4$ (aq)           | 0.092                             | 0.091  | 0.086  | 0.082  | 0.055  | 0.091                               | 0.090  | 0.087  | 0.083  |
| $\text{CdNO}_3^+$               | 0.072                             | 0.072  | 0.068  | 0.064  | 0.042  | 0.072                               | 0.071  | 0.069  | 0.065  |
| $\text{CdSO}_4$ (aq)            | 0.867                             | 0.857  | 0.818  | 0.773  | 0.528  | 0.859                               | 0.851  | 0.827  | 0.790  |
| $\text{Cd-Citrate}^-$           |                                   | 0.033  | 0.160  | 0.314  | 1.323  |                                     |        |        |        |
| $\text{CdH-Citrate}$ (aq)       |                                   | 0.001  | 0.007  | 0.013  | 0.055  |                                     |        |        |        |
| $\text{Cd-Tartrate}$ (aq)       |                                   |        |        |        |        | 0.062                               | 0.123  | 0.302  | 0.581  |
| $\text{CdH-Tartrate}^+$         |                                   |        |        |        |        | 0.000                               | 0.000  | 0.001  | 0.001  |
